# Supplementary material
Source: publisher site journal article supplement (https://www.spandidos-publications.com/7773/downloadSupplementary)

Figure S1. Pathological characteristics of breast mucoepidermoid carcinoma. Immunohistochemical staining showed that the tumor cells exhibited a regional positive staining pattern for (A) GATA binding protein 3, (B) transcriptional repressor GATA binding 1, (C) S100, (D) SOX-10, (E) SYN, (F) estrogen receptor, (G) progesterone receptor, (H) human epidermal growth factor receptor 2 and (I) Ki-67. Magnification, x200.

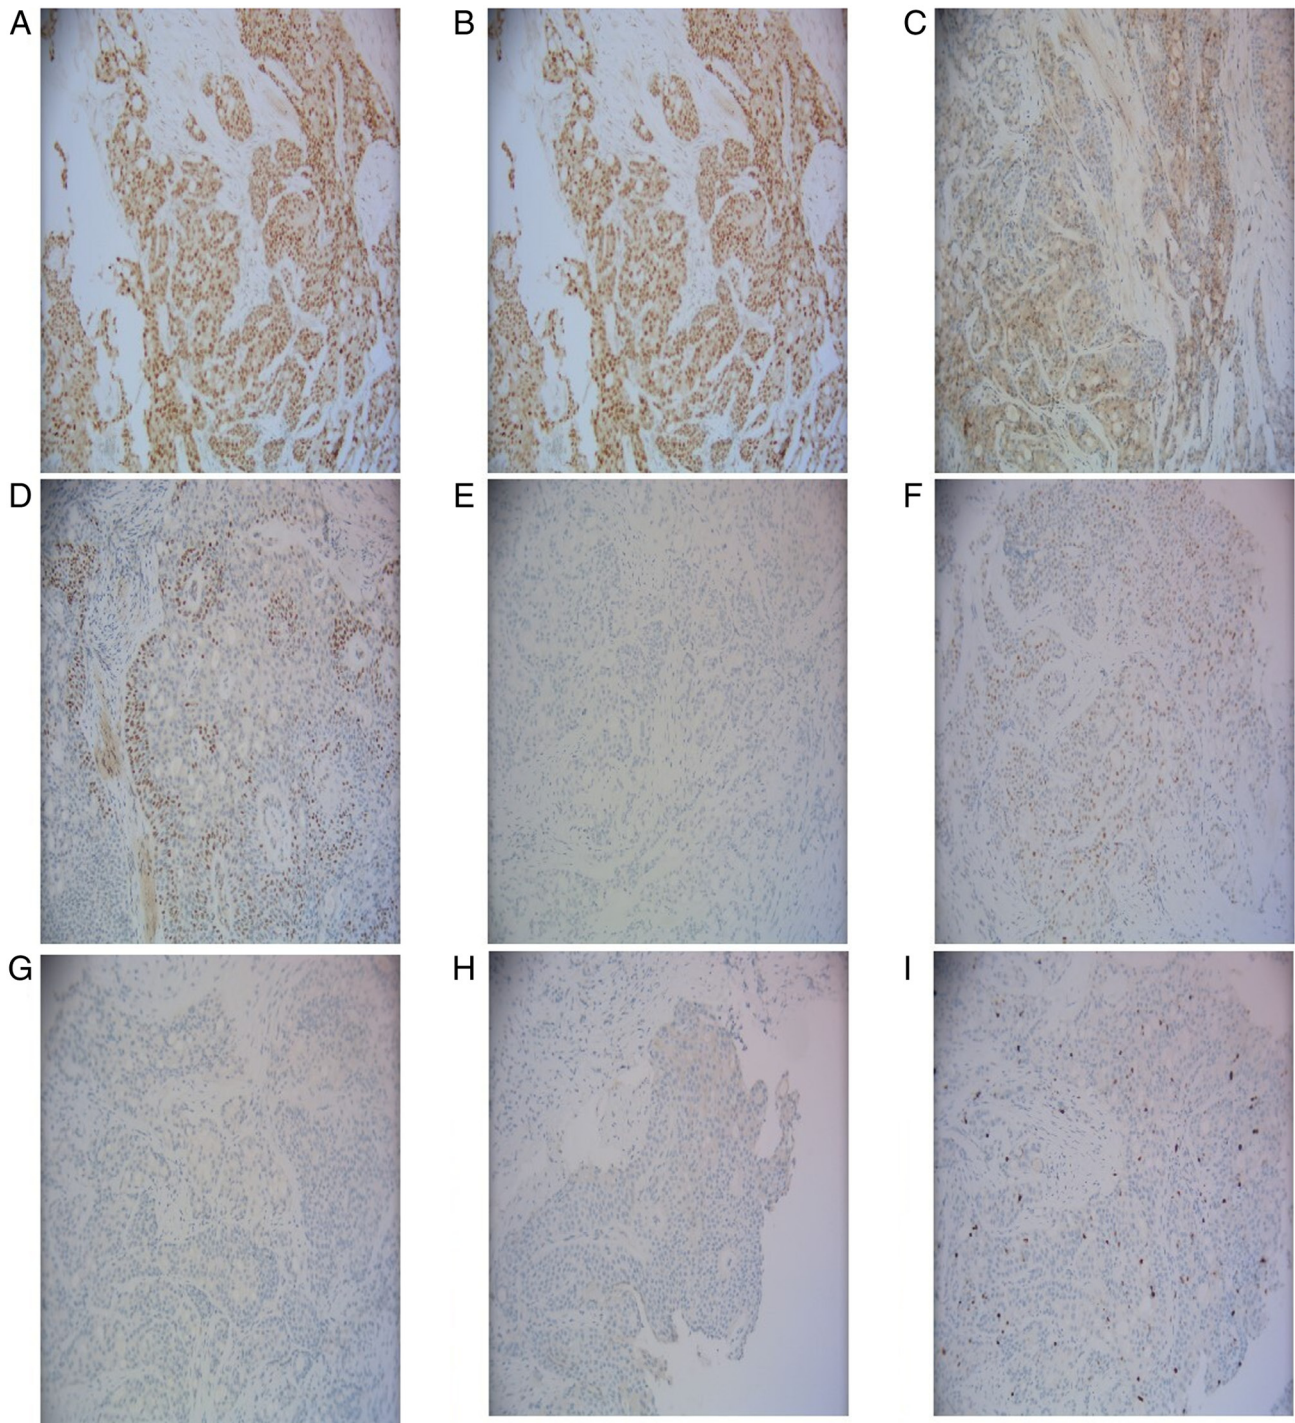

Supplement: Supplementary file 1 [file downloadSupplementary]
